# Supplementary material for: Influence of Dance Programmes on Gait Parameters and Physical Parameters of the Lower Body in Older People: A Systematic Review
Source: MDPI journal article supplement (doi:10.3390/ijerph19031547), 2022-01-29
Supplement: s1 [file s1]

**Supplement S2.** Search terms used in each database**MEDLINE via PubMed**

|    | Searches                                                                                                                                    | Results |
|----|---------------------------------------------------------------------------------------------------------------------------------------------|---------|
| #1 | dance [MeSH] AND mobility [Title/Abstract] AND elderly [Title/Abstract]                                                                     | 144     |
| #2 | dance [MeSH] AND mobility [Title/Abstract] AND elderly [Title/Abstract] Filters applied: in the last 10 years.                              | 101     |
| #3 | dance [MeSH] AND mobility [Title/Abstract] AND elderly [Title/Abstract]. Filters applied: in the last 10 years, Aged: 65+ years             | 62      |
| #4 | dance [MeSH] AND mobility [Title/Abstract] AND elderly [Title/Abstract] NOT disease. Filters applied: in the last 10 years, Aged: 65+ years | 37      |

**SCOPUS**

|    | Searches                                                                                                                                                                                                                                                                                                                                     | Results |
|----|----------------------------------------------------------------------------------------------------------------------------------------------------------------------------------------------------------------------------------------------------------------------------------------------------------------------------------------------|---------|
| #1 | (dance AND mobility AND elderly) AND (LIMIT-TO (PUBYEAR,2021) OR LIMIT-TO (PUBYEAR,2020) OR LIMIT-TO (PUBYEAR,2019) OR LIMIT-TO (PUBYEAR,2018) OR LIMIT-TO (PUBYEAR,2017) OR LIMIT-TO (PUBYEAR,2016) OR LIMIT-TO (PUBYEAR,2015) OR LIMIT-TO (PUBYEAR,2014) OR LIMIT-TO (PUBYEAR,2013) OR LIMIT-TO (PUBYEAR,2012) OR LIMIT-TO (PUBYEAR,2011)) | 33      |

**OVIDSP**

|    | Searches                                                                           | Results |
|----|------------------------------------------------------------------------------------|---------|
| #1 | dance [MeSH] AND mobility [Title/Abstract] AND elderly [Title/Abstract]            | 557     |
| #2 | dance [MeSH] AND mobility [Title/Abstract] AND elderly [Title/Abstract] NO disease | 78      |

**COCHRANE**

|    | Searches                                                                | Results |
|----|-------------------------------------------------------------------------|---------|
| #1 | dance [MeSH] AND mobility [Title/Abstract] AND elderly [Title/Abstract] | 17      |

**PEDRO**

|    | Searches                                                                | Results |
|----|-------------------------------------------------------------------------|---------|
| #1 | dance [MeSH] AND mobility [Title/Abstract] AND elderly [Title/Abstract] | 10      |
|    |                                                                         |         |
